# Supplementary material
Source: PubMed Central journal article supplement (PMC3347659)
Supplement: supp_2011.056101_2011.056101.Xu_suppl.pdf [file supp_2011.056101_2011.056101.Xu_suppl.pdf]

## Expression of the c-Met oncogene by tumor cells predicts a favorable outcome in classical Hodgkin's lymphoma

Chuanhui Xu,<sup>1</sup> Wouter Plattel,<sup>1,2</sup> Anke van den Berg,<sup>1</sup> Nele Rüther,<sup>3</sup> Xin Huang,<sup>1</sup> Miao Wang,<sup>4</sup> Debora de Jong,<sup>1</sup> Hans Vos,<sup>1</sup> Gustaaf van Imhoff,<sup>2</sup> Andreas Viardot,<sup>5</sup> Peter Möller,<sup>3</sup> Sibbrand Poppema,<sup>1</sup> Arjan Diepstra,<sup>1</sup> and Lydia Visser<sup>1</sup>

<sup>1</sup>Department of Pathology and Medical Biology, University Medical Center Groningen, University of Groningen, Groningen, the Netherlands; <sup>2</sup>Department of Hematology, University Medical Center Groningen, University of Groningen, Groningen, the Netherlands; <sup>3</sup>Institute of Pathology, University of Ulm, Ulm, Germany; <sup>4</sup>Department of Pathology, Capital Medical University, Beijing, China, and <sup>5</sup>Department of Internal Medicine III, University Hospital Ulm, Ulm, Germany

Citation: Xu C, Plattel W, van den Berg A, Rüther N, Huang X, Wang M, de Jong D, Vos H, van Imhoff G, Viardot A, Möller P, Poppema S, Diepstra A, and Visser L. Expression of the c-Met oncogene by tumor cells predicts a favorable outcome in classical Hodgkin's lymphoma. *Haematologica* 2012;97(4):572-578. doi:10.3324/haematol.2011.056101

Online Supplementary Table S1. Immunohistochemistry results of c-Met and HGF in cHL cases.

| Case | subtype | EBV status | % of c-MET <sup>+</sup> HRS cells | % of HGF <sup>+</sup> HRS cells |
|------|---------|------------|-----------------------------------|---------------------------------|
| 1    | LD      | +          | 100                               | 7                               |
| 2    | NS      | -          | 100                               | 5                               |
| 3    | NS      | +          | 100                               | 0                               |
| 4    | NS      | -          | 100                               | 0                               |
| 5    | NS      | -          | 100                               | 0                               |
| 6    | NS      | -          | 100                               | 0                               |
| 7    | NOS     | -          | 100                               | 0                               |
| 8    | NS      | +          | 96                                | 96                              |
| 9    | MC      | -          | 95                                | 10                              |
| 10   | NS      | -          | 95                                | 0                               |
| 11   | NS      | -          | 95                                | 0                               |
| 12   | NS      | -          | 95                                | 0                               |
| 13   | NS      | -          | 90                                | 2                               |
| 14   | MC      | +          | 90                                | 0                               |
| 15   | MC      | +          | 90                                | 0                               |
| 16   | MC      | +          | 90                                | 0                               |
| 17   | NS      | -          | 90                                | 0                               |
| 18   | NS      | -          | 90                                | 0                               |
| 19   | MC      | -          | 90                                | 0                               |
| 20   | NS      | +          | 86                                | 40                              |
| 21   | MC      | +          | 83                                | 6                               |
| 22   | NOS     | +          | 80                                | 0                               |
| 23   | NS      | -          | 80                                | 0                               |
| 24   | NS      | -          | 80                                | 0                               |
| 25   | NS      | -          | 80                                | 0                               |
| 26   | NS      | -          | 80                                | 0                               |
| 27   | NS      | -          | 80                                | 0                               |
| 28   | NS      | +          | 80                                | N.D.                            |
| 29   | MC      | +          | 80                                | N.D.                            |
| 30   | NOS     | -          | 80                                | N.D.                            |
| 31   | NS      | -          | 79                                | 0                               |
| 32   | NS      | -          | 72                                | 0                               |
| 33   | LR      | -          | 70                                | 10                              |
| 34   | NS      | -          | 70                                | 1                               |
| 35   | NS      | +          | 70                                | 0                               |
| 36   | NS      | +          | 70                                | 0                               |
| 37   | NS      | -          | 70                                | 0                               |
| 38   | NS      | -          | 70                                | 0                               |
| 39   | NS      | -          | 70                                | 0                               |
| 40   | MC      | -          | 70                                | 0                               |

continued on next page

continued from previous page

|    |     |   |    |      |
|----|-----|---|----|------|
| 41 | NS  | - | 70 | N.D. |
| 42 | NOS | - | 70 | N.D. |
| 43 | MC  | - | 70 | N.D. |
| 44 | NS  | - | 60 | 10   |
| 45 | NS  | - | 60 | 1    |
| 46 | MC  | + | 60 | 0    |
| 47 | NS  | - | 60 | 0    |
| 48 | NS  | - | 60 | 0    |
| 49 | NS  | - | 60 | 0    |
| 50 | NS  | - | 60 | 0    |
| 51 | NS  | - | 60 | 0    |
| 52 | NS  | - | 60 | 0    |
| 53 | NS  | - | 60 | 0    |
| 54 | NS  | - | 60 | N.D. |
| 55 | MC  | + | 54 | 10   |
| 56 | MC  | - | 50 | 50   |
| 57 | MC  | - | 50 | 27   |
| 58 | NS  | - | 50 | 2    |
| 59 | NS  | + | 50 | 0    |
| 60 | MC  | + | 50 | 0    |
| 61 | MC  | - | 50 | 0    |
| 62 | NS  | + | 50 | N.D. |
| 63 | NOS | + | 50 | N.D. |
| 64 | NS  | - | 50 | N.D. |
| 65 | NS  | - | 50 | N.D. |
| 66 | NS  | - | 50 | N.D. |
| 67 | NS  | - | 40 | 4    |
| 68 | NOS | - | 40 | N.D. |
| 69 | NS  | - | 38 | 0    |
| 70 | NS  | - | 38 | 0    |
| 71 | NOS | - | 33 | 8    |
| 72 | NS  | - | 30 | 17   |
| 73 | MC  | + | 30 | 0    |
| 74 | MC  | + | 30 | 0    |
| 75 | NS  | - | 30 | 0    |
| 76 | NS  | - | 30 | 0    |
| 77 | NS  | - | 30 | 0    |
| 78 | NS  | - | 30 | 0    |
| 79 | NS  | - | 30 | 0    |
| 80 | NS  | - | 30 | 0    |
| 81 | NS  | + | 26 | 0    |
| 82 | NS  | - | 20 | 5    |
| 83 | NS  | - | 20 | 0    |
| 84 | NS  | - | 20 | 0    |
| 85 | NS  | - | 20 | 0    |
| 86 | MC  | - | 20 | 0    |
| 87 | NS  | + | 20 | N.D. |
| 88 | NS  | + | 17 | 0    |
| 89 | NS  | - | 17 | 0    |
| 90 | NS  | - | 13 | 0    |
| 91 | NS  | - | 10 | 5    |
| 92 | NS  | - | 10 | 0    |
| 93 | NS  | - | 10 | 0    |
| 94 | NS  | - | 10 | 0    |
| 95 | NS  | - | 10 | 0    |
| 96 | MC  | - | 10 | 0    |
| 97 | MC  | - | 10 | 0    |

continued on next page

continued from previous page

|     |     |   |    |      |
|-----|-----|---|----|------|
| 98  | NS  | + | 10 | N.D. |
| 99  | NOS | + | 10 | N.D. |
| 100 | MC  | - | 10 | N.D. |
| 101 | MC  | - | 10 | N.D. |
| 102 | NS  | + | 9  | 0    |
| 103 | NS  | - | 8  | 0    |
| 104 | NS  | - | 5  | 100  |
| 105 | NS  | - | 5  | 30   |
| 106 | NS  | - | 5  | 10   |
| 107 | NS  | + | 5  | 0    |
| 108 | MC  | + | 5  | 0    |
| 109 | NS  | - | 5  | 0    |
| 110 | NS  | - | 5  | 0    |
| 111 | NS  | - | 5  | 0    |
| 112 | NS  | - | 5  | 0    |
| 113 | NS  | + | 5  | N.D. |
| 114 | NS  | - | 5  | N.D. |
| 115 | NS  | - | 5  | N.D. |
| 116 | NS  | - | 5  | N.D. |
| 117 | NS  | - | 5  | N.D. |
| 118 | NS  | - | 5  | N.D. |
| 119 | MC  | - | 5  | N.D. |
| 120 | NS  | + | 4  | 0    |
| 121 | NS  | - | 2  | 10   |
| 122 | NS  | - | 2  | 2    |
| 123 | LR  | - | 2  | 0    |
| 124 | LR  | - | 1  | 20   |
| 125 | NS  | + | 1  | 2    |
| 126 | NS  | - | 1  | 0    |
| 127 | MC  | - | 1  | 0    |
| 128 | NS  | - | 1  | N.D. |
| 129 | NS  | - | 1  | N.D. |
| 130 | NS  | - | 0  | 100  |
| 131 | NS  | + | 0  | 70   |
| 132 | NS  | - | 0  | 20   |
| 133 | NS  | + | 0  | 0    |
| 134 | MC  | + | 0  | 0    |
| 135 | NS  | - | 0  | 0    |
| 136 | NS  | - | 0  | 0    |
| 137 | NS  | - | 0  | 0    |
| 138 | NS  | - | 0  | 0    |
| 139 | NS  | - | 0  | 0    |
| 140 | NS  | - | 0  | 0    |
| 141 | NS  | - | 0  | 0    |
| 142 | NS  | - | 0  | 0    |
| 143 | NS  | - | 0  | 0    |
| 144 | NOS | - | 0  | 0    |
| 145 | MC  | - | 0  | 0    |
| 146 | MC  | - | 0  | 0    |
| 147 | MC  | - | 0  | 0    |
| 148 | MC  | - | 0  | 0    |
| 149 | NS  | - | 0  | N.D. |
| 150 | NS  | - | 0  | N.D. |
| 151 | NS  | - | 0  | N.D. |
| 152 | NS  | - | 0  | N.D. |
| 153 | NOS | - | 0  | N.D. |

NS: nodular sclerosis; MC: mixed cellularity; LR: lymphocyte rich; LD: lymphocyte depleted; NOS: not otherwise specified; "+" indicates EBV-positive status, "-" indicates EBV-negative status; N.D.: not determined.

**Online Supplementary Table S2. c-Met expression by HRS cells in relation to disease parameters, EBV status and HGF expression.**

| Characteristic      | c-Met positive (n =80)<br>N. of patients (%) | c-Met negative (n=73)<br>N. of patients (%) | P value |
|---------------------|----------------------------------------------|---------------------------------------------|---------|
| Median age (range)  | 28 (8-73)                                    | 29 (7-75)                                   | 0.49    |
| Male                | 39 (49)                                      | 42 (58)                                     | 0.33    |
| Histology subtype   |                                              |                                             | 0.58    |
| Nodular sclerosis   | 54 (68)                                      | 56 (77)                                     |         |
| Mixed cellularity   | 14 (18)                                      | 9 (12)                                      |         |
| Lymphocyte rich     | 1 (1)                                        | 2 (3)                                       |         |
| Lymphocyte depleted | 1 (1)                                        | -                                           |         |
| cHL, NOS            | 10 (13)                                      | 6 (8)                                       |         |
| Ann Arbor Stage     |                                              |                                             | 0.62    |
| I-II                | 47 (59)                                      | 40 (55)                                     |         |
| III-IV              | 32 (40)                                      | 33 (45)                                     |         |
| n.a.                | 1 (1)                                        | -                                           |         |
| EBV status          |                                              |                                             | 0.34    |
| Positive            | 21 (26)                                      | 14 (19)                                     |         |
| Negative            | 59 (74)                                      | 59 (81)                                     |         |
| HGF(n=121)          |                                              |                                             | 0.32    |
| positive            | 4 (6)                                        | 6 (11)                                      |         |
| negative            | 63 (94)                                      | 48 (89)                                     |         |

cHL NOS: classical Hodgkin's lymphoma not otherwise specified; n.a.: not available.

**Online Supplementary Table S3. Univariate and multivariate Cox regression analysis for FFTP for c-Met expression and other clinical prognostic factors in the separate cohorts.**

| German cohort          | N. | Univariate |          | Multivariate |     |          |       |
|------------------------|----|------------|----------|--------------|-----|----------|-------|
|                        |    | HR         | 95% CI   | P            | HR  | 95% CI   | P     |
| c-Met expression < 30% | 42 | 4.2        | 1.4-13.2 | 0.013        | 3.9 | 1.3-12.3 | 0.018 |
| Stage III/IV           | 40 | 4.6        | 1.5-14.4 | 0.008        | 4.5 | 1.4-13.9 | 0.010 |
| IPS ≥ 3                | 22 | 1.6        | 0.4-6.4  | 0.472        |     |          |       |
| B-symptoms present     | 45 | 1.3        | 0.5-3.6  | 0.556        |     |          |       |
| Bulky disease          | 27 | 1.5        | 0.5-4.1  | 0.451        |     |          |       |

| Dutch cohort           | N. | Univariate |          | Multivariate |    |        |   |
|------------------------|----|------------|----------|--------------|----|--------|---|
|                        |    | HR         | 95% CI   | P            | HR | 95% CI | P |
| c-Met expression < 30% | 31 | 8.7        | 1.1-69.9 | 0.041        |    |        |   |
| Stage III/IV           | 25 | 1.2        | 0.3-4.6  | 0.757        |    |        |   |
| IPS ≥ 3                | 13 | 3.0        | 0.3-29.2 | 0.343        |    |        |   |
| B-symptoms present     | 25 | 2.3        | 0.6-8.7  | 0.226        |    |        |   |
| Bulky disease          | 19 | 2.5        | 0.7-9.3  | 0.182        |    |        |   |
